# Supplementary material for: Nonlinear optical behavior of n-tuple decker phthalocyanines at the nanosecond regime: investigation of change in mechanisms
Source: Royal Society of Chemistry journal article supplement (doi:10.1039/c9ra01836k), 2019-01-01
Supplement: c9ra01836k1.pdf [file c9ra01836k1.pdf]

# Nonlinear Optical Behavior of n-Tuple Decker Phthalocyanines at Nanosecond Regime: Investigation of Change in Mechanisms

Kutloano E. Sekhosana\*, Tebello Nyokong\*

Institute for Nanotechnology and Innovation, Department of Chemistry, Rhodes University, PO Box 94, Grahamstown 6140, South Africa

*KEYWORDS: Coordination algorithm; n-tuple decker phthalocyanines; mechanisms;  $\pi$ -electron system; triplet population; cross sections.*

## Table of contents

|                                                                  |   |
|------------------------------------------------------------------|---|
| Figure S1: Proton NMR spectra.....                               | 2 |
| Figure S2: Mass spectra of complexes.....                        | 3 |
| Figure S3: ESR Spectra of complexes.....                         | 3 |
| Figure S4: Triplet decay curves of complexes 3a and 3b.....      | 4 |
| Figure S5: Luminescence decay curves of complexes 3a and 3b..... | 5 |
| Figure S6: SEM images of thin films.....                         | 6 |

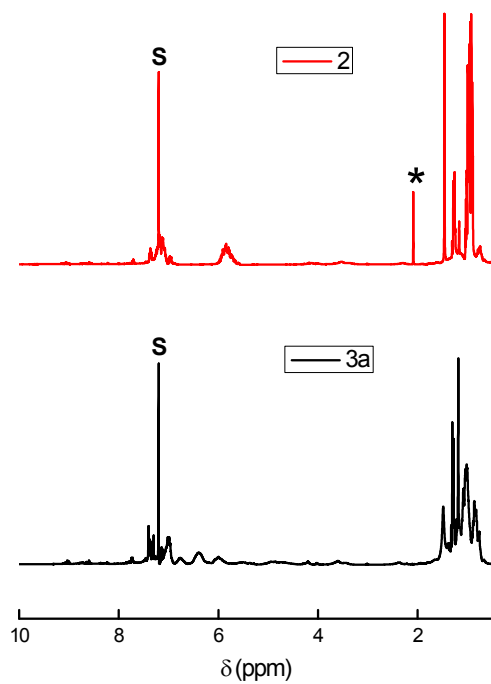

**Figure S1:**  $^1\text{H}$  NMR spectra for complexes **2** and **3a** in  $\text{CDCl}_3$  shown as examples. The solvent and water impurities are with "s" and an asterisk, respectively.

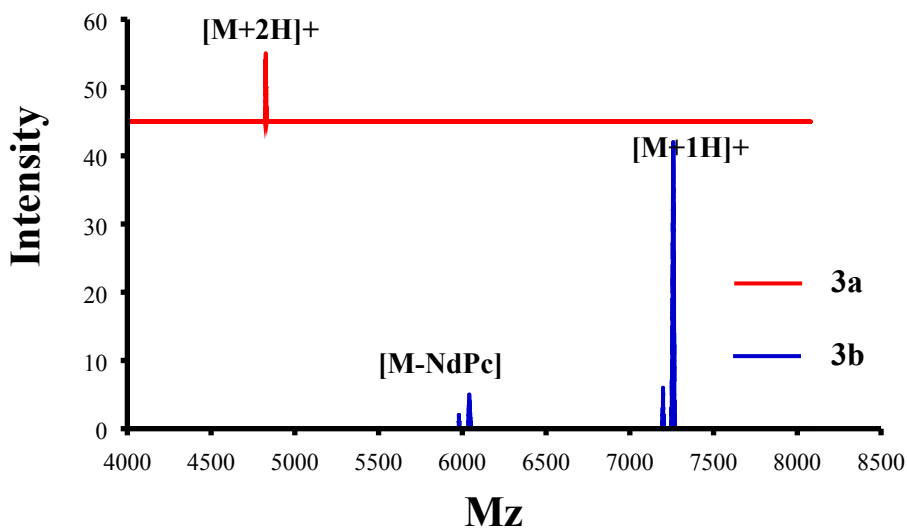

**Figure S2:** The mass spectral signatures for complexes **3a** and **3b** used as an example for the data presented in this manuscript. The cleaving off of NdPc from complex **3b** was detected.

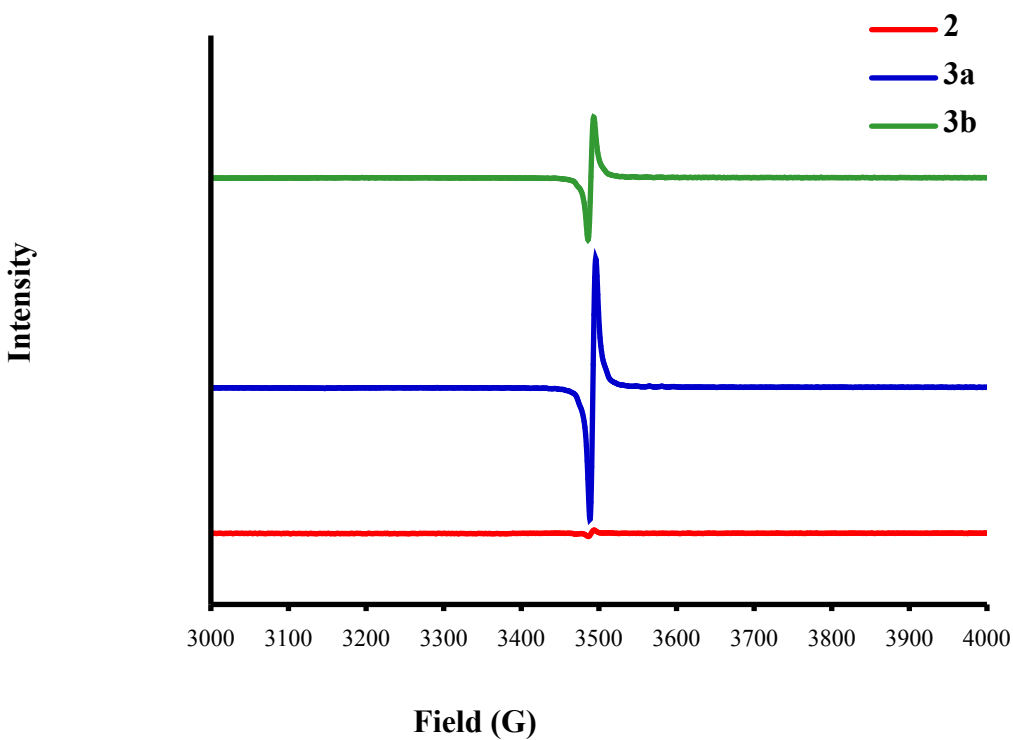

**Figure S3:** The ESR signals for complexes **2**, **3a** and **3b** in powder form. It can be observed that **3a** and **3b** are more paramagnetic than **2**.

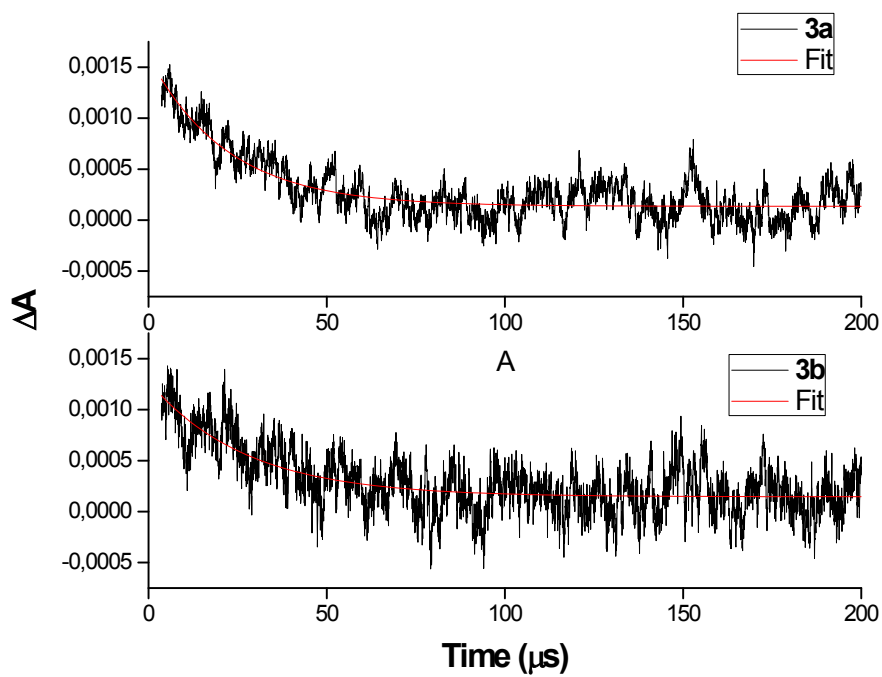

**Figure S4:** Triplet decay curves for complexes **3a** and **3b** obtained in tetrahydrofuran using laser flash photolysis. The triplet lifetimes for complexes **3a** and **3b** were 27  $\mu\text{s}$  and 22  $\mu\text{s}$ , respectively.

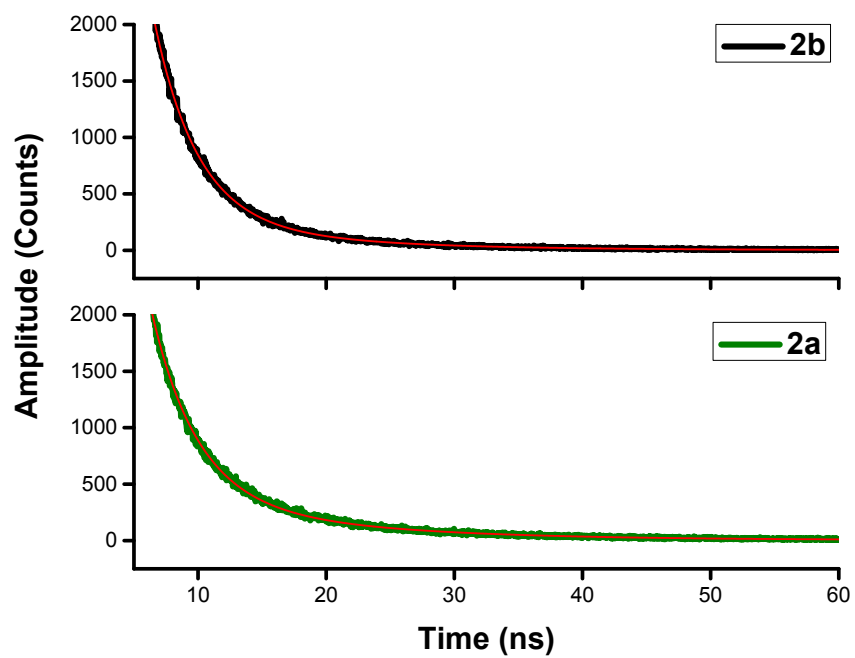

**Figure S5:** Luminescence decay curves for complexes **3a** and **3b** obtained in dichloromethane using TCSPC. The luminescence lifetimes for complexes **3a** and **3b** were 5.4 ns and 4.5 ns, respectively.

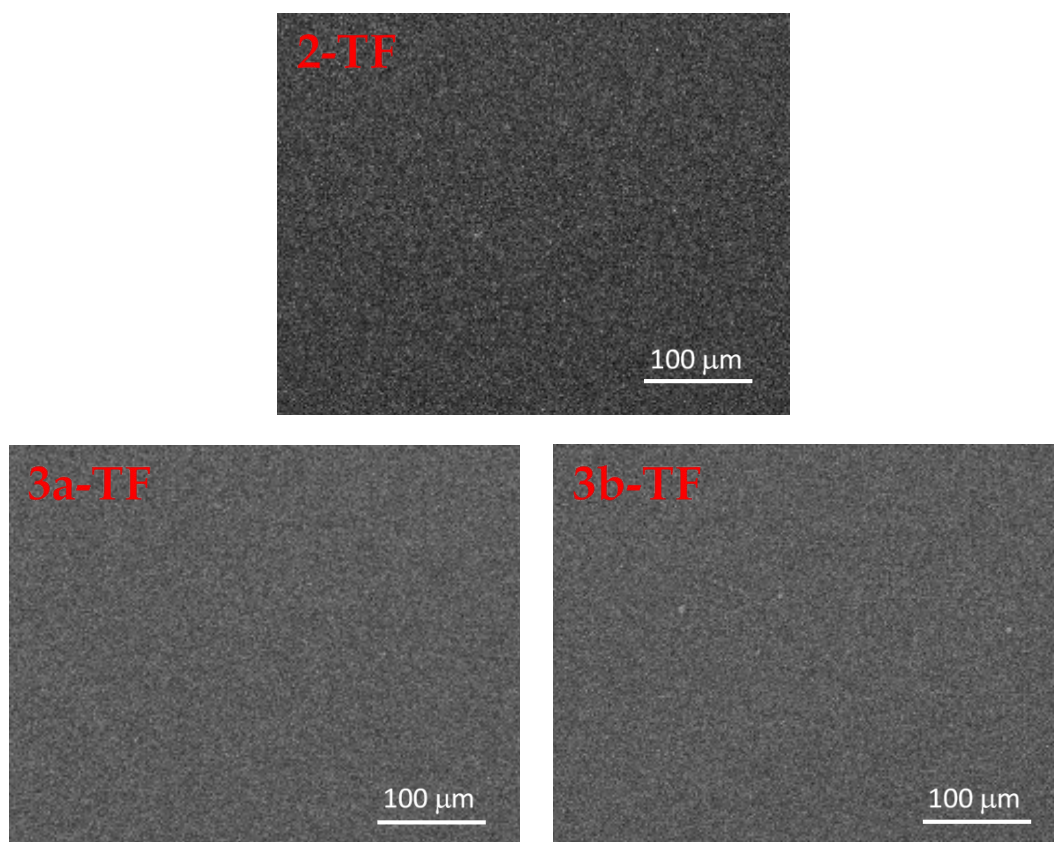

**Figure S6:** SEM images of **2-TF**, **3a-TF** and **3b-TF** indicating homogeneity and lack of damage on the laser-irradiated surfaces.
